# Supplementary material for: Evidence for Small RNAs Homologous to Effector-Encoding Genes and Transposable Elements in the Oomycete Phytophthora infestans
Source: PLoS One. 2012 Dec 14;7(12):e51399. doi: 10.1371/journal.pone.0051399 (PMC3522703; doi:10.1371/journal.pone.0051399)
Supplement: Table S2 — Global profile of sRNAs mapping to RxLRs, Crinklers and transposons, in different life cycle stages and isolates. (XLSX) [file pone.0051399.s012.xlsx]

## Sheet: Sheet1
RXLR		All R0 vs3928A	R0-Germinating cysts vs 3928A-Germinating cysts stages	R0-Germinating sporangium vs 3928A-Germinating sporangium stages	R0-Mycelium vs 3928A-Mycelium stages	R0- sporangium vs 3928A- sporangium stages
PITG_04178	270	-1.37851	0.0202172	-1.33666	-0.579429	-2.27054				Interpretation of the data
PITG_14955	498	-1.34104	-0.39482	-2.11427	-1.74935	-1.18962		This data show the log difference between the different isolates and life cycle stages. The results are shown in log 2 format.
PITG_22891	252	-1.32193	-1.61721	-0.529305	0.420571	-2.61846
PITG_22675	363	-1.27302	-1.85425	-0.666809	-0.801821	-1.39607		Name	length	All R0 vs3928A	R0-Germinating cysts vs 3928A-Germinating cysts stages	R0-Germinating sporangium vs 3928A-Germinating sporangium stages	R0-Mycelium vs 3928A-Mycelium stages	R0- sporangium vs 3928A- sporangium stages
PITG_10654	462	-1.27009	-0.39482	-1.64478	-1.2575	-1.13303		PITG_22875	405	-1.75519	-4.18663	-0.249688	-0.530519	-4.83664
PITG_17310	330	-1.23447	-2.56475	0.64062	0.742499	-3.20342
PITG_02387	327	-1.22948	-0.809858	-0.0767932	-1.85954	-1.8111
PITG_04373	426	-1.22239	-1.97978	-1.11427	-2.57943	-0.00374878		-1,75 in All R0 vs3928A, implies that there are almost 4 times more reads in the 3928A isolate compared to R0 isolate (2 to the power of 1,75). The positive value of 1,75 would imply that there are almost 4 times more reads in the R0 isolate compared to 3928A isolate (2 to the power of 1,75).
PITG_01875	588	-1.2115	-0.979783	-1.61677	1.00553	-0.728642
PITG_15728	561	-1.18763	0.283252	-0.644783	-2.38678	-1.22614
PITG_05910	597	-1.18286	-1.56475	-0.583753	0.420571	-1.8555
PITG_16705	2037	-1.18057	-1.41189	-0.178398	-0.282447	-1.92658
PITG_22926	597	-1.16146	-1.64275	-0.583753	0.420571	-1.68557
PITG_16515	468	-1.16046	-1.20218	-1.26627	1.15754	-2.98103
PITG_19308	288	-1.11548	-1.71675	-2.11427	-0.579429	1.1889
PITG_14965	270	-1.09954	-1.71675	0.470695	-0.994466	-0.548069
PITG_11429	462	-1.09954	-0.39482	0.148767	0.420571	-1.3136
PITG_21933	390	-1.06413	-1.39482	-1.11427	-0.994466	-0.396066
PITG_04164	360	-1	1.02022	-0.529305	-1.16439	-2.8111
PITG_04165	360	-1	1.02022	-0.529305	-1.16439	-2.8111
PITG_07947	462	-1	0.342145	-1.52931	-2.57943	-0.226141
PITG_12721	330	-1	-0.39482	-0.266271	-0.579429	-1.13303
PITG_12276	423	-1	-0.979783	-0.529305	-1.57943	-0.0741381
PITG_04350	945	-0.971986	-0.0728922	-0.898539	-0.164391	-1.16474
PITG_21984	945	-0.971986	-0.0728922	-0.898539	-0.164391	-1.16474
PITG_22089	408	-0.969626	0.60518	-1.4362	-0.579429	-1.8111
PITG_20052	504	-0.947533	-2.71675	-1.69923	1.42057	-0.00374878
PITG_10227	414	-0.947533	0.342145	-1.52931	0.00553387	-1.27054
PITG_04074	528	-0.947533	-2.91838	-0.529305	-0.257501	0.840973
PITG_23125	597	-0.938599	-1.13179	-0.181382	-1.84246	-0.341618
PITG_04353	939	-0.93587	-0.202175	-0.962265	0.683606	-1.20342
PITG_15235	552	-0.934905	-3.56475	-0.348733	1.7425	-1.13303
PITG_22900	237	-0.932886	-1.71675	0.792623	-0.579429	-1.54807
PITG_23069	360	-0.917538	2.19014	-2.52931	-0.579429	-0.811104
PITG_04050	306	-0.893085	-0.979783	-0.529305	-0.579429	-1.39607
PITG_15086	498	-0.893085	-0.0577853	-0.33666	-2.90136	-0.659101
PITG_06094	489	-0.887525	-0.716748	0.20766	-1.16439	-0.811104
PITG_18215	447	-0.882643	0.364172	-0.72195	0.00553387	-1.15903
PITG_09585	1020	-0.882643	0.315673	-0.529305	-1.84246	-0.811104
PITG_10808	663	-0.836501	-0.809858	-0.969878	-0.579429	0.188896
PITG_04203	471	-0.836501	0.60518	-1.85123	-0.994466	-0.173674
PITG_18908	504	-0.836501	0.119753	-0.944343	-0.994466	-0.811104
PITG_09510	315	-0.825971	-0.979783	-0.628841	0.227926	-0.948607
PITG_05980	486	-0.825971	0.60518	0.0556571	-1.57943	-1.17367
PITG_16726	1527	-0.819428	-1.14484	0.248302	-0.878989	-0.774578
PITG_15109	342	-0.819428	-0.617213	-0.529305	-0.994466	-0.396066
PITG_05912	408	-0.815575	0.60518	-1.64478	-0.441925	-1.39607
PITG_14932	270	-0.807355	-1.39482	0.470695	-0.994466	-0.548069
PITG_22894	276	-0.807355	0.60518	-0.529305	-0.579429	-0.396066
PITG_22868	456	-0.807355	1.82757	-1.11427	-1.38678	-1.22614
PITG_00774	486	-0.807355	1.19014	-2.98874	-2.16439	1.1889
PITG_13503	753	-0.80023	-0.501736	-0.0438786	0.313656	-1.16474
PITG_05918	408	-0.799701	0.0202172	-0.666809	-0.427426	-1.39607
PITG_13959	390	-0.796467	-0.979783	-0.907817	0.420571	-0.489176
PITG_22757	486	-0.788496	-0.39482	-2.52931	0.420571	-0.133032
PITG_19655	1077	-0.782095	-0.252801	-0.462191	-0.526961	-0.926581
PITG_09499	318	-0.777608	-2.09526	0.66334	0.642964	-1.51154
PITG_23227	318	-0.777608	-2.09526	0.66334	0.642964	-1.51154
PITG_19992	1077	-0.766328	-0.202175	-0.462191	-0.526961	-0.904213
PITG_21739	315	-0.765535	-0.809858	0.011263	-0.994466	-0.685573
PITG_13125	660	-0.760812	-0.835393	0.622698	-0.357036	-0.981029
PITG_05911	408	-0.758992	0.827572	-1.64478	-0.441925	-1.39607
PITG_08943	351	-0.758992	0.0202172	-0.33666	-2.57943	-0.226141
PITG_22870	351	-0.758992	0.0202172	-0.33666	-2.57943	-0.226141
PITG_18156	633	-0.750972	-0.716748	-1.26627	-0.257501	-0.263616
PITG_08317	516	-0.74366	-0.979783	0.030122	0.783141	-2.09121
PITG_23202	411	-0.736966	0.60518	-1.85123	-0.579429	-0.659101
PITG_09498	318	-0.724366	-2.09526	0.470695	0.642964	-1.0335
PITG_12952	453	-0.716207	-1.97978	-1.52931	1.42057	-0.00374878
PITG_09741	414	-0.710493	1.34215	-1.11427	-0.579429	-1.61846
PITG_09771	348	-0.710493	-2.20218	1.20766	-0.579429	-0.296531
PITG_06074	507	-0.70044	-0.494356	0.011263	1.00553	-1.68557
PITG_06432	513	-0.691878	-0.131786	-0.266271	1.00553	-1.13303
PITG_13550	369	-0.688056	-0.809858	0.470695	-0.842463	-0.588711
PITG_22999	306	-0.678072	0.190142	0.0556571	-1.57943	-0.396066
PITG_14434	372	-0.678072	-1.39482	-1.33666	0.00553387	0.603934
PITG_01904	357	-0.678072	1.60518	-0.529305	0.420571	-1.13303
PITG_23126	270	-0.678072	0.0202172	0.885732	-0.579429	-0.981029
PITG_09054	282	-0.678072	-0.716748	-1.85123	1.7425	-1.13303
PITG_18153	282	-0.678072	-0.716748	-1.52931	1.7425	-1.39607
PITG_16180	330	-0.6746	-0.939141	-0.446843	-0.257501	0.134449
PITG_18675	324	-0.662965	-0.39482	-2.11427	-0.579429	0.188896
PITG_20972	354	-0.652077	-0.716748	-0.944343	0.420571	-0.00374878
PITG_22828	408	-0.652077	0.0202172	0.470695	-0.579429	-1.39607
PITG_13543	522	-0.652077	0.283252	-0.266271	-2.16439	-0.396066
PITG_13507	861	-0.649668	-0.845482	0.0150151	1.42057	-1.08573
PITG_11507	291	-0.63743	0.60518	-1.11427	1.42057	-2.39607
PITG_13072	585	-0.63743	-0.202175	-1.26627	0.642964	-0.811104
PITG_14797	369	-0.63743	-0.39482	-0.114268	1.42057	-1.8111
PITG_09496	318	-0.628031	-1.5103	0.66334	0.642964	-1.27054
PITG_05072	408	-0.621488	-0.617213	-0.207377	-0.579429	0.188896
PITG_04355	441	-0.621488	-1.39482	0.148767	-1.16439	-0.00374878
PITG_04331	459	-0.612977	0.60518	-1.22975	-0.579429	0.0189713
PITG_14203	462	-0.605721	0.119753	-1.33666	0.00553387	-0.576638
PITG_08500	465	-0.584963	-0.046897	-0.29484	-0.357036	-0.527311
PITG_00619	411	-0.584963	-1.20218	0.792623	-1.90136	0.188896
PITG_04153	270	-0.584963	-0.716748	-1.52931	0.420571	-0.0741381
PITG_14954	498	-0.584963	0.60518	-2.11427	-1.2575	-0.296531
PITG_14959	498	-0.584963	0.60518	-2.11427	-1.2575	-0.296531
PITG_14961	498	-0.584963	0.60518	-2.11427	-1.2575	-0.296531
PITG_14962	498	-0.584963	0.60518	-2.11427	-1.2575	-0.296531
PITG_01934	399	-0.584963	0.60518	-1.69923	0.420571	-0.173674
PITG_21152	441	-0.559427	0.24261	-0.377302	-0.357036	-0.527311
PITG_22889	231	-0.559427	-1.56475	0.885732	0.642964	-2.13303
PITG_22890	231	-0.559427	-1.56475	0.885732	0.642964	-2.13303
PITG_09732	1428	-0.558628	-0.202175	-0.72195	0.420571	-0.509075
PITG_17063	483	-0.540568	0.0202172	-0.851233	-1.57943	0.188896
PITG_09689	390	-0.514573	-0.202175	-0.0598201	-0.842463	-0.198127
PITG_06083	309	-0.514573	1.19014	-0.266271	0.420571	-0.811104
PITG_22998	306	-0.5025	1.19014	0.470695	-1.57943	-1.22614
PITG_15930	741	-0.5025	1.11975	-1.19227	-1.57943	0.188896
PITG_19800	621	-0.4975	0.60518	0.885732	-3.16439	-0.325677
PITG_08903	504	-0.4975	0.60518	-0.944343	-0.579429	-0.396066
PITG_16235	390	-0.494765	0.190142	1.20766	-1.16439	-0.728642
PITG_23046	336	-0.485427	1.02022	-1.52931	-0.579429	-0.133032
PITG_09503	303	-0.485427	-0.979783	2.47069	0.420571	-1.39607
PITG_23042	414	-0.485427	-0.716748	-1.52931	-1.57943	1.1889
PITG_22990	465	-0.485427	-2.20218	-0.266271	1.00553	0.925862
PITG_17217	270	-0.485427	-0.716748	-0.266271	0.00553387	-0.10061
PITG_09632	321	-0.485427	-1.39482	-1.11427	1.00553	-0.296531
PITG_16248	360	-0.485427	3.19014	-2.52931	-0.579429	-0.548069
PITG_16402	360	-0.485427	3.19014	-2.52931	-0.579429	-0.133032
PITG_07741	348	-0.485427	-1.97978	-1.52931	1.00553	0.773859
PITG_23061	648	-0.473931	-0.979783	-0.529305	-0.164391	0.674323
PITG_10835	726	-0.469485	0.0202172	-0.266271	-2.38678	0.295811
PITG_15424	687	-0.459432	-1.71675	0.148767	-0.901357	0.295811
PITG_15764	1056	-0.455004	-0.09526	-0.384915	0.742499	-0.30209
PITG_09497	216	-0.452512	-1.20218	0.885732	0.642964	-2.13303
PITG_13956	345	-0.447459	0.0202172	-0.666809	0.420571	-0.10061
PITG_21645	345	-0.447459	0.0202172	-0.666809	0.420571	-0.10061
PITG_13538	480	-0.447459	0.0202172	0.470695	-2.57943	0.188896
PITG_23016	234	-0.447459	1.60518	-1.85123	-2.16439	0.188896
PITG_06552	243	-0.447459	0.283252	0.011263	-0.164391	-0.502981
PITG_16424	390	-0.430634	0.190142	1.20766	-1.16439	-0.576638
PITG_14960	498	-0.428843	0.96775	-2.11427	-1.2575	-0.159027
PITG_07533	780	-0.415037	-0.269289	-0.751698	0.420571	0.674323
PITG_06076	510	-0.415037	-0.39482	-0.529305	-0.994466	0.603934
PITG_13529	489	-0.415037	2.19014	1.88573	-3.16439	-1.54807
PITG_23074	360	-0.415037	3.41253	-2.69923	-0.579429	-0.811104
PITG_22802	225	-0.415037	-0.39482	-1.11427	-0.579429	0.603934
PITG_23026	219	-0.415037	0.60518	-0.529305	0.420571	-1.8111
PITG_04388	918	-0.40439	-0.564745	0.345164	-1.16439	-0.0741381
PITG_14884	1812	-0.400087	0.797825	-0.969878	-0.579429	-0.169558
PITG_22118	351	-0.398549	-0.242817	-0.207377	-0.579429	0.188896
PITG_14986	399	-0.395929	1.09061	-2.69923	1.00553	-0.659101
PITG_06290	483	-0.389947	0.0906065	-0.33666	-0.579429	-0.159027
PITG_10639	456	-0.387023	-1.20218	-0.114268	-1.57943	0.866968
PITG_13628	726	-0.387023	0.342145	-0.377302	-0.579429	-0.159027
PITG_22256	327	-0.387023	-0.39482	0.470695	-0.0940018	-1.39607
PITG_15278	1560	-0.384664	0.550732	-0.644783	-0.933066	0.0120185
PITG_19523	759	-0.378512	0.467676	-0.229745	-1.42743	0.0284316
PITG_13306	300	-0.378512	-1.39482	-0.529305	-0.579429	0.773859
PITG_23008	345	-0.378512	0.868214	-0.377302	0.00553387	-0.548069
PITG_23009	345	-0.378512	0.868214	-0.377302	0.00553387	-0.548069
PITG_10673	243	-0.378512	-0.39482	-0.851233	-0.579429	0.773859
PITG_18318	378	-0.367897	-0.734026	0.417633	0.905998	-1.85841
PITG_17214	471	-0.365284	0.305619	-0.529305	-1.42743	0.237806
PITG_06305	276	-0.36257	-0.242817	-1.52931	-2.16439	1.99625
PITG_15732	984	-0.358454	-0.39482	-0.529305	-0.0489139	-0.152141
PITG_13452	294	-0.354665	0.958817	-0.666809	-2.16439	-0.0252285
PITG_12458	969	-0.349942	1.19014	-0.72195	-0.409504	-0.443372
PITG_07587	447	-0.341037	1.02022	-1.33666	0.420571	-0.00374878
PITG_07414	474	-0.341037	-0.979783	-1.11427	0.420571	0.977392
PITG_22798	513	-0.341037	0.927108	-0.33666	1.00553	-1.0335
PITG_05751	384	-0.332575	0.342145	-0.35938	-0.316394	0.188896
PITG_14371	444	-0.321928	0.119753	-0.529305	-0.164391	-0.226141
PITG_22712	444	-0.321928	0.60518	-1.52931	-0.579429	0.451931
PITG_22813	219	-0.321928	2.19014	0.470695	-1.57943	-1.13303
PITG_06059	507	-0.31034	-0.716748	0.64062	0.420571	-0.270535
PITG_15315	405	-0.29956	0.60518	-1.64478	0.590496	0.365774
PITG_09773	387	-0.29956	-1.39482	-0.266271	-1.90136	1.99625
PITG_13612	420	-0.29956	-1.71675	1.79262	-0.994466	0.188896
PITG_15177	507	-0.29956	0.0202172	-2.33666	-0.579429	0.488457
PITG_06419	699	-0.295456	0.283252	-0.181382	0.420571	-0.121444
PITG_04052	936	-0.293731	2.32139	-0.377302	0.157537	-0.848578
PITG_09754	285	-0.289507	0.60518	-0.851233	-1.57943	1.51082
PITG_14294	471	-0.289507	0.305619	-0.33666	-1.42743	0.279094
PITG_04085	303	-0.289507	0.60518	0.148767	-0.842463	-0.226141
PITG_04086	303	-0.289507	0.60518	0.148767	-0.842463	-0.226141
PITG_12761	849	-0.283793	-0.482283	-0.628841	0.0986433	0.464531
PITG_14432	372	-0.280108	0.60518	-1.52931	0.420571	0.603934
PITG_19994	777	-0.270089	-0.979783	0.470695	0.157537	0.0734191
PITG_18487	471	-0.266787	0.305619	-0.33666	-1.16439	0.279094
PITG_12722	330	-0.263034	0.60518	-1.52931	-0.579429	0.451931
PITG_12010	252	-0.263034	0.730711	-0.377302	1.42057	-0.548069
PITG_04266	468	-0.263034	-0.564745	0.0556571	0.227926	-0.0175546
PITG_07569	864	-0.259387	0.190142	0.20766	-0.941999	0.0368932
PITG_14086	366	-0.257158	0.0202172	-0.529305	-1.90136	0.712458
PITG_17309	1050	-0.253757	1.34215	-1.11427	-3.16439	0.0596133
PITG_22922	1467	-0.249978	0.283252	-0.365807	0.420571	-0.198127
PITG_01724	504	-0.247928	0.382787	-1.29484	-0.994466	1.03689
PITG_22727	213	-0.247928	0.927108	0.0556571	-2.16439	0.188896
PITG_09111	351	-0.245112	0.190142	-0.529305	-1.16439	0.53682
PITG_17218	936	-0.244419	2.49826	-0.229745	-1.31639	-0.774578
PITG_21949	345	-0.241008	0.60518	-0.229745	-0.357036	-0.0334961
PITG_19307	1221	-0.231326	1.88529	-1.4362	-1.16439	0.816928
PITG_16409	390	-0.231326	0.60518	1.20766	-0.579429	-0.489176
PITG_05121	342	-0.21818	1.09061	-0.71373	-0.386784	-0.184562
PITG_18221	318	-0.214125	1.34215	-0.33666	-0.579429	-0.351672
PITG_19998	690	-0.214125	0.868214	-0.907817	-0.901357	0.925862
PITG_19528	381	-0.211504	-1.39482	1.31869	-1.57943	-0.173674
PITG_22547	423	-0.206451	-0.131786	0.470695	-1.57943	0.451931
PITG_15225	666	-0.20482	-1.05779	-0.377302	1.7425	-0.341618
PITG_16663	627	-0.201634	0.382787	-1.52931	1.00553	-0.325677
PITG_22945	507	-0.192645	0.382787	-0.79234	-0.994466	0.826326
PITG_22884	465	-0.192645	0.190142	2.05566	0.00553387	-0.659101
PITG_11839	468	-0.192645	0.60518	0.470695	-1.57943	0.188896
PITG_22978	570	-0.192645	0.927108	-0.114268	0.420571	-0.489176
PITG_15152	2283	-0.18133	0.412535	-0.251771	0.268568	0.137366
PITG_22825	444	-0.178337	0.283252	-0.69923	0.420571	0.250297
PITG_15038	1488	-0.175087	0.868214	-0.365807	-0.119997	-0.0226078
PITG_04339	723	-0.175087	-0.242817	-0.0438786	-0.901357	0.636355
PITG_22766	246	-0.175087	1.98369	-0.403775	-0.579429	-0.396066
PITG_04063	936	-0.174029	1.11975	-1.94434	0.0986433	0.358821
PITG_23035	2805	-0.168877	0.902161	-1.14402	-0.386784	0.25209
PITG_21107	438	-0.160465	2.19014	-0.751698	-0.164391	-0.618459
PITG_22879	996	-0.155278	1.41253	-2.4362	-0.386784	0.262897
PITG_00821	294	-0.152003	-0.131786	-0.529305	0.420571	0.188896
PITG_14374	444	-0.152003	1.60518	0.0556571	-0.357036	-0.396066
PITG_23054	678	-0.152003	1.19014	0.470695	-1.16439	-0.133032
PITG_22375	432	-0.149378	-0.183316	0.775549	-1.06486	0.188896
PITG_07634	480	-0.146841	-0.716748	0.248302	-0.579429	0.674323
PITG_04279	288	-0.14439	0.0202172	0.66334	-0.579429	-0.133032
PITG_12737	507	-0.14439	1.34215	-1.11427	0.420571	-0.133032
PITG_22730	465	-0.14439	-1.71675	1.05566	-0.901357	0.478403
PITG_08133	516	-0.137504	-0.979783	-0.751698	-0.579429	0.674323
PITG_18683	303	-0.131245	0.60518	-0.0147322	-0.316394	-0.00374878
PITG_16283	609	-0.129283	0.0202172	-1.11427	-2.16439	1.12178
PITG_15123	1548	-0.125531	0.212862	-0.0528674	-0.901357	0.381541
PITG_19526	378	-0.125531	-0.39482	1.47069	-1.31639	0.0189713
PITG_23154	240	-0.125531	1.34215	-1.52931	-0.579429	2.1889
PITG_05146	414	-0.120294	-0.131786	-0.266271	-0.994466	1.06337
PITG_23215	486	-0.115477	0.60518	0.470695	0.642964	-0.474069
PITG_13093	465	-0.111031	-0.979783	-0.207377	-1.57943	1.1889
PITG_04300	678	-0.111031	0.868214	-2.33666	1.7425	0.188896
PITG_04169	363	-0.106915	-0.39482	0.0556571	-0.579429	0.866968
PITG_04354	441	-0.106915	0.60518	0.0556571	-1.57943	1.77386
PITG_21190	1020	-0.106915	1.34215	-0.266271	-0.579429	-0.045569
PITG_04055	1098	-0.10497	-0.301711	0.377585	0.835609	0.124766
PITG_23135	273	-0.10497	-0.674928	-0.607308	-0.0940018	1.09579
PITG_07773	435	-0.103093	-0.202175	0.30077	1.42057	-0.0521118
PITG_15940	402	-0.103093	-0.716748	0.27805	-0.0940018	0.773859
PITG_12710	303	-0.100929	0.226668	-1.02407	-2.16439	0.988598
PITG_22880	606	-0.0995357	0.797825	-0.0438786	-0.579429	0.188896
PITG_11484	408	-0.0931094	2.19014	0.148767	-0.579429	-1.0335
PITG_12046	378	-0.0931094	1.02022	0.733729	-2.16439	0.188896
PITG_06087	384	-0.0931094	0.775105	-1.85123	-1.06486	1.1889
PITG_05750	495	-0.0901978	0.927108	-0.403775	-1.57943	0.411289
PITG_22925	378	-0.0824622	0.60518	-2.11427	1.00553	0.188896
PITG_15341	354	-0.0796172	0.0608592	0.470695	-0.26532	0.0155647
PITG_05068	378	-0.0780025	-0.39482	0.20766	1.00553	0.188896
PITG_20144	501	-0.0780025	-0.716748	-1.85123	-0.579429	1.51082
PITG_15712	414	-0.0740006	1.92711	-0.529305	0.742499	-0.396066
PITG_09861	702	-0.0703893	0.953103	-0.207377	1.42057	-0.183072
PITG_11344	354	-0.0694214	0.0608592	0.532095	-0.272767	0.0155647
PITG_13940	345	-0.0687128	0.60518	0.122771	-0.216859	0.0734191
PITG_07451	384	-0.0671142	-1.39482	0.733729	0.420571	0.648328
PITG_07499	357	-0.0588937	0.60518	-0.207377	0.157537	0.188896
PITG_05014	2052	-0.0582986	-0.146893	0.470695	-0.491966	0.493751
PITG_09160	507	-0.0565835	0.60518	-2.33666	-1.57943	1.27636
PITG_06308	765	-0.0544478	-0.564745	-1.52931	-2.57943	1.85186
PITG_16242	390	-0.0524674	0.60518	1.69309	0.00553387	-0.439135
PITG_05076	660	-0.0473057	0.0906065	-0.377302	-0.579429	0.996251
PITG_23014	510	-0.0443941	0.074665	0.181188	-0.579429	0.889336
PITG_23015	510	-0.0443941	0.074665	0.181188	-0.579429	0.889336
PITG_14443	522	-0.0443941	-0.0728922	-0.33666	-2.16439	0.741437
PITG_10232	522	-0.0374747	1.60518	0.470695	-2.90136	-0.0334961
PITG_11947	1154	-0.0227201	0.444715	-0.529305	-0.801821	0.729465
PITG_14685	1410	-0.017278	1.19014	0.0783772	0.923072	-0.379387
PITG_07630	960	-0.0149503	0.152667	-0.467905	1.00553	0.351168
PITG_23036	1455	-0.0142139	0.74957	0.411801	-0.579429	0.127496
PITG_05074	693	0	0.60518	-0.666809	-0.164391	0.729465
PITG_05133	780	0	-0.242817	-1.26627	0.880003	0.840973
PITG_13018	636	0	0.757183	0.66334	0.642964	-0.811104
PITG_14662	405	0	-1.05779	0.792623	1.00553	0.352395
PITG_15142	1473	0	0.505644	0.011263	-0.463951	0.460198
PITG_08150	588	0	1.13569	-0.777233	-1.06486	0.996251
PITG_09213	456	0	0.96775	-1.61677	0.00553387	0.603934
PITG_06099	489	0	0.342145	-0.79234	0.420571	0.826326
PITG_16529	468	0	0.60518	-0.266271	2.22793	-1.0335
PITG_20365	357	0	-0.131786	-0.266271	1.00553	0.603934
PITG_07689	315	0	0.60518	-1.11427	1.00553	-0.133032
PITG_04097	324	0	0.60518	-0.851233	1.00553	0.188896
PITG_23185	294	0	-0.32082	-0.777233	-0.164391	1.23072
PITG_09223	432	0	2.92711	0.248302	-0.579429	-0.10061
PITG_23231	219	0	1.60518	-0.851233	-2.16439	1.77386
PITG_09739	381	0	0.190142	1.05566	0.420571	-0.0741381
PITG_07482	255	0	0.60518	1.47069	-1.16439	0.188896
PITG_02779	381	0	2.60518	-1.11427	1.00553	-0.548069
PITG_16294	462	0	-0.131786	0.0556571	-0.579429	0.703469
PITG_22987	213	0	1.60518	-1.52931	-0.579429	0.451931
PITG_23199	213	0	1.60518	-1.52931	-0.579429	0.451931
PITG_22816	246	0	0.60518	-0.529305	-1.57943	0.925862
PITG_05981	285	0	0.119753	-1.11427	1.42057	0.866968
PITG_07387	864	0.0101718	2.19014	-0.296106	-0.0489139	-0.160595
PITG_15125	1548	0.0166787	0.342145	0.0556571	-0.941999	0.54735
PITG_22722	936	0.0181473	1.28325	-0.944343	-0.357036	0.330915
PITG_06375	1407	0.0201076	0.808713	0.251128	-0.820437	0.316652
PITG_08624	1014	0.0324215	1.49826	-0.0438786	-1.80182	0.3264
PITG_05983	456	0.0345868	0.418767	-0.248405	-1.16439	0.479193
PITG_22676	486	0.0374747	0.412535	0.985268	0.00553387	-0.0590312
PITG_19309	879	0.0384741	0.96775	-1.01473	-0.579429	0.925862
PITG_07550	717	0.0384741	0.226668	-0.666809	0.590496	0.826326
PITG_12731	1116	0.0458037	0.145748	-0.628841	1.00553	0.464531
PITG_08174	594	0.0473057	1.74268	-1.52931	0.420571	0.3264
PITG_10116	957	0.0524674	0.730711	-0.436196	1.06443	-0.6736
PITG_05841	663	0.0524674	0.60518	-0.114268	0.157537	0.866968
PITG_15287	642	0.0565835	1.02022	0.693087	-2.16439	0.13827
PITG_07500	357	0.0588937	0.60518	0.470695	1.22793	-0.46318
PITG_15679	816	0.0622843	1.67557	0.313153	0.420571	-1.20342
PITG_17316	1050	0.0641303	1.11975	-0.851233	-2.16439	0.703469
PITG_02918	726	0.0641303	0.60518	-0.114268	-1.31639	1.06337
PITG_13119	903	0.0641303	0.742683	-0.809413	0.0986433	0.925862
PITG_04367	552	0.0671142	-1.97978	0.470695	2.22793	0.188896
PITG_16188	375	0.0671142	1.92711	1.05566	1.00553	-0.618459
PITG_15127	1548	0.0679041	0.342145	0.148767	-0.772074	0.594153
PITG_08949	300	0.0740006	1.19014	-1.98874	1.00553	1.45193
PITG_14368	447	0.0780025	0.775105	0.248302	0.558075	-0.226141
PITG_18880	465	0.0780025	1.82757	0.148767	-1.31639	0.188896
PITG_16285	414	0.0794345	0.412535	0.148767	2.6685	-0.448534
PITG_22683	522	0.0801703	1.39873	-0.921623	-0.994466	0.491459
PITG_16195	1530	0.0824622	0.233211	0.33945	-0.731432	0.70827
PITG_18609	450	0.0824622	-0.39482	0.792623	-2.57943	0.840973
PITG_15757	492	0.0824622	2.60518	-2.52931	1.00553	0.188896
PITG_02900	477	0.0874628	1.60518	-0.377302	-1.57943	0.53682
PITG_04282	492	0.0874628	1.30562	-0.529305	2.00553	-0.351672
PITG_09836	483	0.0901978	0.60518	-0.529305	0.157537	0.719411
PITG_05978	396	0.0909882	0.475544	-0.204466	-0.257501	0.519758
PITG_10640	480	0.0931094	0.0202172	-1.52931	0.742499	0.773859
PITG_20303	303	0.0995357	2.19014	0.470695	0.157537	-1.0335
PITG_15114	1566	0.101283	1.98369	-0.114268	-0.409504	0.24779
PITG_13930	345	0.106915	1.60518	-0.114268	0.420571	0.188896
PITG_14984	399	0.106915	0.0202172	0.248302	0.420571	0.603934
PITG_22986	294	0.106915	1.02022	1.20766	-1.16439	-0.226141
PITG_11350	366	0.111031	0.283252	-0.114268	-0.0940018	0.603934
PITG_21288	714	0.112475	1.24261	-2.85123	0.227926	0.551466
PITG_16541	285	0.115477	0.190142	1.47069	1.00553	-0.0741381
PITG_10248	720	0.115477	-0.39482	1.20766	-0.164391	0.188896
PITG_04329	312	0.115477	1.19014	2.05566	-0.579429	-0.173674
PITG_20301	303	0.115477	2.19014	0.0556571	0.157537	-1.13303
PITG_20857	396	0.115477	1.60518	-1.11427	0.00553387	0.411289
PITG_06092	288	0.115477	-0.39482	0.0556571	0.420571	0.773859
PITG_04194	324	0.120294	0.60518	-0.751698	0.00553387	0.691397
PITG_15039	1518	0.121991	0.992203	0.129658	0.157537	0.282006
PITG_07558	735	0.125531	0.797825	-0.529305	0.00553387	0.436824
PITG_15255	384	0.128324	-0.09526	0.885732	-0.409504	0.594889
PITG_20940	552	0.131245	-1.97978	0.733729	2.22793	0.188896
PITG_04182	357	0.137504	1.19014	-1.11427	-0.579429	0.925862
PITG_04099	609	0.145851	0.0202172	1.17113	0.590496	0.188896
PITG_22871	609	0.146841	0.868214	-0.0147322	-1.31639	0.816928
PITG_17670	855	0.152003	0.479649	-0.166735	2.22793	0.542533
PITG_22724	474	0.152003	1.09061	-1.11427	1.7425	-0.173674
PITG_06485	324	0.152003	-0.39482	1.12277	0.00553387	-0.296531
PITG_12706	357	0.154034	0.730711	-0.579931	-0.579429	1.0254
PITG_15454	357	0.154034	0.730711	-0.579931	-0.579429	1.0254
PITG_13509	660	0.156119	0.775105	0.108125	0.642964	0.282006
PITG_04167	492	0.160465	-1.71675	1.05566	0.420571	0.840973
PITG_21422	366	0.163499	0.342145	-0.114268	-0.0940018	0.773859
PITG_21740	2130	0.166897	0.161573	0.25919	-0.386784	0.901614
PITG_09622	834	0.167727	2.66407	-0.5737	-3.16439	0.703469
PITG_09935	396	0.169925	1.19014	0.885732	-1.31639	0.510824
PITG_09109	705	0.176878	1.60518	-0.207377	-0.579429	0.423362
PITG_22725	273	0.176878	-0.809858	-0.0147322	2.00553	0.773859
PITG_18405	480	0.180572	0.60518	-1.52931	0.742499	0.773859
PITG_21778	420	0.180572	-1.71675	0.0556571	-0.579429	1.64833
PITG_23137	474	0.180572	1.19014	-0.529305	1.7425	-0.226141
PITG_23239	474	0.180572	1.19014	-0.529305	1.7425	-0.226141
PITG_10396	432	0.186413	2.30562	-1.11427	-0.994466	0.411289
PITG_13847	1536	0.195016	1.2726	-1.11427	0.0986433	0.636355
PITG_15110	2130	0.196143	0.128742	0.13366	-0.299321	1.02715
PITG_23117	375	0.201634	1.09061	2.05566	0.00553387	-0.46318
PITG_12402	417	0.206451	1.60518	1.05566	0.00553387	-0.296531
PITG_13481	423	0.206451	1.34215	-1.52931	-0.579429	0.996251
PITG_04090	303	0.206451	2.60518	-0.266271	0.742499	-0.548069
PITG_02830	357	0.206451	0.60518	0.470695	0.00553387	0.451931
PITG_06077	357	0.206451	1.92711	-1.52931	1.7425	-0.396066
PITG_19529	708	0.206451	0.96775	-1.11427	1.7425	0.719411
PITG_23132	231	0.206451	1.60518	1.05566	-0.994466	0.188896
PITG_16845	930	0.222392	1.19014	0.27805	-0.316394	0.358821
PITG_13936	291	0.222392	2.60518	-2.11427	0.420571	-0.226141
PITG_04326	408	0.234465	0.927108	1.05566	-1.90136	0.996251
PITG_07203	285	0.234465	1.92711	-0.266271	2.00553	-0.548069
PITG_21238	384	0.23816	0.60518	0.345164	-2.38678	1.1889
PITG_15556	369	0.241008	3.19014	-0.529305	-1.57943	-0.0741381
PITG_04089	309	0.241008	0.60518	0.470695	-0.579429	0.674323
PITG_19831	636	0.245112	1.34215	0.011263	0.420571	0.603934
PITG_09586	777	0.247928	0.60518	0.377585	-0.579429	0.694132
PITG_14983	399	0.247928	0.60518	-0.33666	1.42057	0.773859
PITG_19232	435	0.251539	3.60518	-0.266271	-0.257501	-0.10061
PITG_15226	675	0.253757	1.24261	-0.529305	-0.316394	0.911362
PITG_13047	558	0.255257	2.60518	-0.907817	0.420571	0.603934
PITG_16844	930	0.257158	1.19014	0.27805	-0.316394	0.451931
PITG_06478	1455	0.257158	2.19014	0.20766	-0.289922	0.0148669
PITG_23206	243	0.263034	1.60518	-0.114268	1.00553	0.188896
PITG_05846	789	0.267104	0.517717	-0.529305	0.590496	0.810385
PITG_10347	1329	0.272372	1.44168	-0.71373	-0.772074	0.925862
PITG_22935	366	0.273018	0.283252	-0.0147322	0.420571	0.773859
PITG_22729	465	0.275634	-0.39482	2.05566	-1.16439	0.996251
PITG_04081	318	0.289507	0.60518	0.470695	0.420571	0.188896
PITG_13537	465	0.29956	0.60518	-0.266271	0.00553387	1.1889
PITG_13044	756	0.305329	2.05525	0.250646	0.346571	0.19046
PITG_14788	717	0.307429	2.19014	0.190587	0.590496	0.0301985
PITG_19302	1524	0.31719	1.4283	-1.52931	0.313656	0.714965
PITG_13048	756	0.318129	2.04607	0.259375	0.4601	0.213611
PITG_10341	1275	0.321928	2.07911	-0.288297	-0.409504	0.578843
PITG_16836	570	0.321928	1.19014	-0.529305	-0.579429	1.35882
PITG_18986	357	0.321928	0.190142	1.47069	-2.16439	2.51082
PITG_02843	381	0.321928	1.09061	0.792623	0.420571	0.188896
PITG_22933	483	0.321928	-0.131786	-1.52931	1.00553	1.30437
PITG_09647	834	0.322245	1.03604	0.340387	-1.47251	0.657705
PITG_13536	351	0.347923	0.190142	0.470695	0.00553387	0.996251
PITG_09758	414	0.353637	0.775105	0.0556571	0.420571	1.03689
PITG_20616	1065	0.353637	1.60518	-0.529305	-0.579429	0.603934
PITG_15337	501	0.354665	0.398729	1.39669	-1.74935	0.826326
PITG_17871	1539	0.355481	1.60518	0.236229	1.42057	0.231965
PITG_19942	357	0.36257	1.34215	0.470695	1.00553	0.188896
PITG_18981	432	0.367732	0.742683	0.470695	0.227926	0.826326
PITG_07594	450	0.371969	-0.979783	0.792623	-2.57943	1.51082
PITG_07766	348	0.378512	1.60518	0.470695	0.420571	0.451931
PITG_13534	351	0.387023	0.190142	0.470695	-0.579429	1.35882
PITG_20300	303	0.387023	2.60518	-0.114268	1.42057	0.188896
PITG_15162	510	0.389042	0.730711	1.12277	1.42057	0.118507
PITG_10348	624	0.389947	0.479649	0.833265	0.420571	0.996251
PITG_09218	498	0.392317	0.927108	0.885732	-0.164391	0.603934
PITG_07556	720	0.393664	2.22256	-0.319382	-1.90136	0.103815
PITG_18147	504	0.395929	0.60518	-0.529305	0.00553387	1.41129
PITG_23120	504	0.395929	0.60518	-0.529305	0.00553387	1.41129
PITG_22844	555	0.395929	0.60518	0.470695	-0.164391	0.826326
PITG_19996	390	0.405256	1.41253	0.108125	0.742499	0.358821
PITG_15032	1458	0.409763	1.44472	0.254966	1.5905	0.163361
PITG_15037	345	0.415037	2.07911	0.108125	-0.579429	-0.0334961
PITG_04145	387	0.415037	2.92711	-0.529305	-0.579429	0.603934
PITG_07597	450	0.415037	1.34215	1.05566	-0.579429	0.188896
PITG_18510	540	0.415037	1.49826	0.108125	0.00553387	0.773859
PITG_09685	273	0.415037	0.60518	0.792623	-1.57943	1.51082
PITG_11383	366	0.415037	0.60518	0.148767	0.642964	0.773859
PITG_14046	348	0.415037	0.60518	-1.33666	0.420571	1.60393
PITG_07555	513	0.415037	1.45318	-0.0147322	-0.164391	0.773859
PITG_07954	801	0.427421	2.36007	0.470695	-0.357036	0.188896
PITG_08399	402	0.430634	0.60518	1.88573	1.00553	0.314427
PITG_22853	402	0.430634	0.60518	1.88573	1.00553	0.314427
PITG_07435	501	0.430634	0.119753	0.956121	0.742499	0.826326
PITG_09216	528	0.436099	0.60518	0.20766	0.00553387	1.1889
PITG_02860	408	0.440573	-0.39482	1.79262	1.42057	0.674323
PITG_23048	483	0.440573	-0.716748	-1.11427	0.420571	1.41129
PITG_04290	462	0.443607	1.45318	0.318692	1.00553	0.188896
PITG_16737	729	0.457851	1.96775	0.222767	0.835609	0.389195
PITG_22896	585	0.459432	0.827572	-0.207377	0.420571	1.27636
PITG_23011	225	0.459432	1.60518	0.470695	-0.579429	0.674323
PITG_16243	360	0.469485	3.60518	-1.52931	-0.579429	0.411289
PITG_14054	690	0.476438	1.28325	0.318692	0.420571	0.733217
PITG_21303	639	0.485427	1.02022	0.30077	0.420571	1.51082
PITG_23047	483	0.485427	-0.39482	0.470695	1.42057	0.719411
PITG_04280	600	0.494765	0.412535	-0.114268	1.22793	1.30437
PITG_13045	408	0.4975	1.60518	0.0556571	0.227926	0.703469
PITG_18670	318	0.5025	1.02022	1.47069	-0.579429	0.603934
PITG_23129	333	0.514573	0.0202172	1.69309	-0.579429	0.510824
PITG_23193	327	0.514573	-0.131786	0.885732	1.42057	1.03689
PITG_12791	1452	0.519374	1.90064	0.57023	0.121011	0.388205
PITG_13593	426	0.523562	1.69829	-0.529305	0.642964	0.773859
PITG_16282	288	0.530515	1.60518	-1.11427	0.420571	1.41129
PITG_04196	423	0.530515	2.60518	0.20766	-0.579429	0.729465
PITG_09837	369	0.530515	2.41253	0.20766	-0.901357	1.1889
PITG_14732	420	0.536053	2.34215	0.470695	2.42057	-0.685573
PITG_21362	735	0.536053	0.60518	2.05566	-1.57943	1.06337
PITG_11384	366	0.540568	0.60518	0.20766	0.590496	1.1889
PITG_00582	648	0.547488	1.74268	-0.207377	-1.57943	1.12178
PITG_10244	405	0.552541	0.283252	0.148767	1.00553	1.3264
PITG_14360	483	0.557995	0.868214	0.66334	0.157537	0.996251
PITG_11953	621	0.561879	0.342145	1.05566	-0.579429	1.41129
PITG_11952	810	0.572579	2.68047	-0.891875	-0.579429	0.913262
PITG_15303	387	0.584963	2.7751	-0.0147322	1.00553	0.188896
PITG_07736	363	0.584963	-0.39482	1.05566	0.420571	1.51082
PITG_13535	351	0.584963	0.0202172	-0.529305	1.00553	2.1889
PITG_18685	318	0.584963	0.60518	2.05566	-0.579429	0.996251
PITG_22604	318	0.584963	0.60518	2.05566	-0.579429	0.996251
PITG_08278	357	0.584963	0.60518	-0.529305	1.00553	1.77386
PITG_20025	357	0.584963	0.60518	-0.529305	1.00553	1.77386
PITG_06030	627	0.594361	1.34215	0.677145	1.7425	0.729465
PITG_01907	1011	0.600393	1.22667	-0.0268051	-0.216859	1.60393
PITG_16738	729	0.604071	1.28325	-0.33666	-1.90136	1.77386
PITG_09838	369	0.612977	2.41253	0.20766	-0.579429	1.1889
PITG_09915	396	0.621488	0.60518	0.470695	-0.579429	3.1889
PITG_23226	567	0.624133	0.894686	0.371159	0.894503	1.12018
PITG_07566	654	0.631613	1.94913	1.20766	-1.16439	0.471296
PITG_19803	351	0.63743	-0.39482	-0.529305	1.00553	2.1889
PITG_15318	360	0.63743	3.60518	-1.11427	0.420571	-0.396066
PITG_16708	498	0.640458	2.10768	1.14877	0.0986433	0.340899
PITG_15277	486	0.641546	1.28325	0.248302	-3.38678	2.1889
PITG_04148	435	0.641546	1.19014	-0.529305	2.00553	1.1889
PITG_10672	420	0.643856	0.342145	-0.851233	1.42057	1.67432
PITG_16193	420	0.652077	-1.39482	2.05566	0.420571	1.77386
PITG_23024	969	0.658963	1.60518	-0.628841	1.88	1.1889
PITG_15105	2082	0.665882	2.02022	-0.29484	-0.579429	1.23197
PITG_02897	402	0.667425	0.0202172	0.66334	0.742499	1.45193
PITG_15718	465	0.667425	2.60518	0.956121	-0.579429	0.551466
PITG_21681	465	0.667425	2.60518	0.956121	-0.579429	0.551466
PITG_08074	732	0.668486	1.71053	-0.0073527	-0.801821	1.09579
PITG_00579	486	0.678072	1.60518	-0.114268	1.00553	0.703469
PITG_06071	348	0.678072	0.868214	2.47069	-0.579429	0.510824
PITG_04314	465	0.704544	1.25726	0.470695	1.7425	0.947888
PITG_23092	516	0.704544	-0.202175	0.885732	0.157537	2.1149
PITG_23131	360	0.716207	0.0202172	1.69309	-1.57943	1.30437
PITG_15753	498	0.718229	1.49826	0.470695	0.157537	1.13231
PITG_10818	978	0.736966	1.11975	0.470695	1.7425	1.25929
PITG_18956	330	0.736966	0.868214	-0.114268	0.420571	1.92586
PITG_10339	591	0.75336	2.47965	-0.207377	-1.90136	1.09579
PITG_04049	474	0.754888	1.02022	0.148767	-0.579429	1.35882
PITG_22929	342	0.758992	0.60518	0.885732	1.00553	1.08198
PITG_12719	288	0.765535	0.60518	0.0556571	1.42057	1.77386
PITG_22932	354	0.765535	2.60518	-1.11427	-1.16439	0.451931
PITG_10540	1203	0.776225	1.52272	0.470695	-0.994466	1.53285
PITG_01905	309	0.777608	3.19014	0.885732	-2.57943	1.08198
PITG_00707	393	0.793549	0.190142	-0.266271	1.7425	1.77386
PITG_23216	234	0.807355	0.382787	1.31869	-0.579429	2.64833
PITG_15763	1002	0.816495	2.64832	1.23987	-0.0648555	0.576404
PITG_18325	390	0.817136	1.25726	0.693087	0.420571	1.27636
PITG_12423	417	0.830075	1.60518	0.470695	1.42057	0.773859
PITG_19617	357	0.830075	0.927108	-0.114268	1.00553	1.77386
PITG_14783	393	0.836501	2.41253	0.0556571	0.00553387	1.1889
PITG_09224	420	0.847997	2.24261	0.0556571	1.00553	0.801873
PITG_22740	1728	0.85599	1.7751	0.092183	-0.78588	1.58999
PITG_20336	258	0.859137	0.894686	-0.266271	2.15754	1.15413
PITG_06413	339	0.874469	0.60518	0.470695	1.42057	0.603934
PITG_04351	318	0.884523	0.60518	1.05566	1.00553	1.1889
PITG_03155	750	0.89812	1.60518	0.248302	1.7425	1.35882
PITG_05096	1116	0.899071	1.92711	0.122771	0.420571	1.60393
PITG_03192	435	0.906891	1.19014	2.79262	-0.579429	0.451931
PITG_15166	519	0.911429	1.5677	0.830425	0.835609	1.24154
PITG_12816	246	0.917867	1.57319	0.882325	0.157537	1.23748
PITG_15304	552	0.956931	1.98369	1.20766	0.00553387	0.966504
PITG_05095	1116	0.95818	1.7751	0.470695	0.742499	1.49146
PITG_04139	435	0.966833	2.19014	-0.529305	2.00553	1.41129
PITG_16233	372	0.98388	1.24261	0.30077	2.22793	1.1275
PITG_16240	372	0.98388	1.24261	0.30077	2.22793	1.1275
PITG_20934	372	0.984233	1.24261	0.30077	1.55807	1.21992
PITG_20936	372	0.984233	1.24261	0.30077	1.55807	1.21992
PITG_15972	285	1	0.927108	1.47069	0.420571	1.77386
PITG_23210	402	1.0114	2.42621	-0.42977	1.22793	1.71941
PITG_14787	393	1.04731	2.7751	0.470695	-0.164391	1.41129
PITG_09316	1146	1.05658	2.69829	0.117058	-0.579429	1.40391
PITG_19518	804	1.05833	2.58906	0.318692	0.338109	1.15719
PITG_16427	372	1.08153	1.88529	1.14877	0.812889	1.15719
PITG_14673	825	1.09686	2.34215	-0.19227	1.22793	2.2669
PITG_21388	459	1.09954	2.34215	-0.114268	1.42057	1.45193
PITG_22972	231	1.1375	1.60518	0.470695	1.42057	0.188896
PITG_16275	513	1.14296	1.47965	3.27805	0.642964	1.12178
PITG_23230	215	1.1481	1.49826	0.693087	1.7425	1.25929
PITG_05118	315	1.15375	1.69023	0.914899	-0.463951	1.6063
PITG_06246	1578	1.21667	3.28439	1.04192	0.520107	0.523738
PITG_15297	360	1.22239	3.60518	-0.529305	-0.579429	0.188896
PITG_05771	855	1.25924	3.21004	0.430053	0.742499	1.0318
PITG_16428	429	1.31487	3.69264	0.345164	-0.316394	1.10643
PITG_12851	336	1.32193	2.19014	0.470695	-1.57943	2.51082
PITG_00366	390	1.41504	0.60518	0.470695	2.00553	2.99625
PITG_17838	429	1.55459	4.07911	0.634193	0.29504	1.45193
PITG_23000	432	1.57731	2.98984	0.0987258	0.268568	2.10643
PITG_14737	429	1.60288	4.10768	0.805114	0.642964	1.41129
PITG_14739	429	1.60288	4.10768	0.805114	0.642964	1.41129
PITG_14736	429	1.67319	4.42718	0.818618	0.799083	1.45193
PITG_14738	429	1.67929	4.42718	0.818618	0.905998	1.45193
PITG_22804	447	1.95174	2.83784	0.938474	0.313656	3.07642
PITG_14093	396	1.96523	3.41253	1.47069	1.00553	2.38154
CRINKLERS
PITG_22875	405	-1.75519	-4.18663	-0.249688	-0.530519	-4.83664
PITG_09057	588	-1.73656	-5.4759	-0.48753	-0.00273374	-5.58798
PITG_22970	582	-1.70296	-6.42129	-0.374646	-0.152295	-6.39782
PITG_22969	555	-1.61635	-6.33976	-0.359115	-0.0168246	-6.37703
PITG_09053	1227	-1.58879	-5.33191	-0.468627	-0.0292757	-5.21005
PITG_09043	1251	-1.52343	-5.17712	-0.518229	0.0655369	-5.05344
PITG_09051	1251	-1.4771	-5.36584	-0.433967	0.0588321	-4.98555
PITG_23182	1251	-1.47399	-5.14118	-0.46042	0.0825928	-4.78543
PITG_18148	1227	-1.43834	-5.16153	-0.433599	0.209684	-4.92023
PITG_18148	1227	-1.43834	-5.16153	-0.433599	0.209684	-4.92023
PITG_18148	1227	-1.43834	-5.16153	-0.433599	0.209684	-4.92023
PITG_18137	1330	-1.43326	-4.9174	-0.432882	0.214422	-4.82308
PITG_22827	304	-1.43296	-3.03868	0.885732	-1.90136	-2.7653
PITG_18144	1227	-1.43141	-5.2316	-0.419352	0.20988	-4.89325
PITG_21034	1251	-1.42888	-5.13725	-0.444913	0.169376	-4.99335
PITG_09046	1243	-1.41425	-4.18312	-0.425227	0.185862	-4.78904
PITG_09047	1251	-1.41172	-4.90558	-0.475319	0.161713	-4.92023
PITG_18133	1245	-1.41028	-4.44673	-0.393233	0.0874361	-4.17576
PITG_09052	1161	-1.39806	-4.80147	-0.458489	0.233201	-4.93172
PITG_09044	1208	-1.32193	-4.99538	-0.371656	0.219503	-4.67316
PITG_20358	1185	-1.31091	-4.85677	-0.366084	0.191819	-4.87445
PITG_22906	354	-1.12553	0.0202172	-1.52931	-0.579429	-1.18962
PITG_23288	378	-1.09954	-2.85425	-0.403775	-1.2575	-0.396066
PITG_22860	237	-1.0614	-2.56475	-0.114268	-0.316394	-1.25168
PITG_16623	2022	-1.05889	-0.905782	-0.381207	-0.342389	-1.42116
PITG_07493	492	-1	-0.854252	-0.529305	-0.994466	-0.704189
PITG_06050	1890	-0.959811	-0.406225	-0.411654	-0.325672	-1.42536
PITG_12074	2253	-0.947679	-0.979783	-0.345859	0.232499	-1.22242
PITG_22754	1281	-0.944602	-0.70516	-0.207377	-1.16439	-1.00375
PITG_04799	1643	-0.908936	-0.829757	-0.326489	-0.0091129	-1.27823
PITG_18824	342	-0.902703	-0.202175	-3.33666	0.00553387	-0.396066
PITG_04749	2226	-0.896907	-0.77729	-0.326142	-0.0940018	-1.00071
PITG_23203	294	-0.788496	-0.39482	-1.52931	1.42057	-0.489176
PITG_12084	723	-0.675038	-1.54457	0.215438	-1.18948	0.188896
PITG_23242	237	-0.667425	-1.39482	-0.114268	1.7425	-0.926581
PITG_22960	2145	-0.663902	0.175192	-0.543381	-0.952887	-0.563176
PITG_16627	1296	-0.594744	-0.242817	-0.290118	-0.0200012	-0.553036
PITG_22751	165	-0.584963	-0.979783	-0.529305	-2.90136	1.1889
PITG_23105	354	-0.571906	-0.0728922	-0.436196	-1.31639	-0.10061
PITG_22985	819	-0.537657	0.226668	0.248302	-1.57943	-0.502981
PITG_23281	489	-0.514573	-1.71675	-0.35938	-0.941999	0.39053
PITG_22753	933	-0.508697	-0.177229	-0.0669622	-0.73697	-0.311533
PITG_22286	924	-0.495695	-0.0899657	-0.622415	-0.920466	-0.00374878
PITG_19316	2120	-0.493989	-1.16421	-0.121881	-0.446978	-0.0543749
PITG_04435	2391	-0.493282	-0.716748	0.0208917	0.112449	-1.00665
PITG_23198	1143	-0.478047	0.527177	-0.239799	-2.31639	-0.180338
PITG_23103	1500	-0.475473	0.083227	-0.42239	-0.396565	-0.286837
PITG_16599	1624	-0.472305	-0.324431	-0.387286	-0.070415	-0.300489
PITG_22962	1248	-0.470451	-0.0537834	-0.583753	-0.0940018	-0.330478
PITG_23180	594	-0.469485	0.119753	-0.751698	-0.579429	-0.045569
PITG_17083	1215	-0.460156	-2.32556	0.0556571	1.48586	-2.56242
PITG_22818	492	-0.427421	-1.39482	-0.403775	1.22793	0.0819811
PITG_07486	492	-0.415037	-1.80986	-0.403775	1.12101	-0.0912116
PITG_20433	561	-0.415037	-0.131786	1.14877	-0.579429	-0.511543
PITG_17625	390	-0.406625	-2.30171	-0.0598201	-0.579429	0.365774
PITG_20167	2511	-0.396706	-0.591857	0.0740356	-0.257501	-0.0995349
PITG_19372	375	-0.394279	-0.242817	-0.266271	-1.16439	0.276359
PITG_12627	612	-0.392317	-0.979783	-0.173162	-0.579429	0.241364
PITG_22968	419	-0.387023	-1.26929	-0.42239	-1.31639	0.624995
PITG_23057	291	-0.387023	0.60518	0.885732	0.420571	-1.39607
PITG_23282	377	-0.374396	1.82757	-2.52931	0.420571	-0.502981
PITG_22988	1134	-0.365649	0.190142	0.190587	-1.35704	0.0189713
PITG_23155	1862	-0.359996	-0.783863	-0.0471537	-0.309339	0.0693147
PITG_17624	976	-0.351844	-0.351752	-0.325772	-0.723819	0.278164
PITG_18497	1305	-0.345891	-0.979783	0.0332893	0.175459	0.149368
PITG_23080	339	-0.334419	-0.39482	-1.69923	-2.38678	1.38154
PITG_23238	1181	-0.324727	-0.214248	0.108125	-0.994466	0.22452
PITG_22829	1217	-0.321928	0.704715	-1.20738	0.198179	-0.296531
PITG_18821	1197	-0.321928	-0.287905	-0.301895	-0.636012	0.29199
PITG_22821	300	-0.321928	-1.71675	0.470695	1.22793	-1.8111
PITG_23181	579	-0.321928	-0.809858	-0.79234	-1.99447	0.996251
PITG_16592	765	-0.316474	-0.301711	-0.529305	-1.57943	0.54504
PITG_16603	1995	-0.310788	-0.809858	-0.0818464	-0.546262	0.264447
PITG_12650	2507	-0.310068	-0.0661976	0.406564	-1.41342	0.0981308
PITG_05697	862	-0.308122	0.827572	0.318692	-0.453898	-0.692459
PITG_18571	1302	-0.304855	-0.897321	0.0783772	0.140463	0.188896
PITG_22953	213	-0.304855	-0.979783	-1.69923	-2.90136	1.88934
PITG_22955	1231	-0.2824	0.102679	0.229687	-0.501426	-0.120432
PITG_18503	1302	-0.280108	-0.914194	0.108125	0.173931	0.209074
PITG_17889	2472	-0.275007	0.257256	0.0232356	-1.13742	0.246999
PITG_22837	2196	-0.274622	0.655806	-0.684584	-1.23151	0.279094
PITG_19572	1683	-0.27432	-0.453714	-0.00993124	-0.396565	0.154131
PITG_07467	492	-0.270089	-1.26929	-0.114268	1.00553	-0.198127
PITG_07467	492	-0.270089	-1.26929	-0.114268	1.00553	-0.198127
PITG_23163	774	-0.263034	-1.0469	0.030122	-0.579429	0.367234
PITG_16594	1276	-0.263034	0.0691268	-0.0598201	0.0726481	-0.144527
PITG_20177	2268	-0.254489	-0.131786	0.0492308	-0.512314	0.13827
PITG_23078	793	-0.253384	0.388368	-0.0553742	-1.08639	0.222063
PITG_19373	1389	-0.253215	-0.937348	0.307196	0.27373	-0.0572643
PITG_19320	846	-0.248679	-0.39482	0.27805	-0.0558667	-0.0385142
PITG_22659	390	-0.247928	1.02022	-2.33666	-1.57943	0.840973
PITG_19574	1769	-0.240517	-0.44373	0.0270879	-0.507279	0.272961
PITG_22954	1287	-0.240134	0.405871	0.0701567	-0.225792	-0.198127
PITG_23087	1296	-0.235628	0.29484	-0.0653583	-0.0230353	-0.164741
PITG_22835	939	-0.22741	0.315673	-0.79234	-0.579429	0.3264
PITG_20172	1296	-0.22741	0.249036	-0.266271	0.179563	-0.0616472
PITG_20423	1185	-0.22556	0.60518	-0.150794	0.157537	-0.0824057
PITG_20997	927	-0.224873	0.283252	0.0836715	0.642964	-0.439135
PITG_16614	1281	-0.219169	-0.324431	0.12674	-0.164391	0.188896
PITG_17199	1374	-0.218305	-0.62831	0.544695	-0.081929	0.188896
PITG_16591	2514	-0.217307	-0.14818	0.274297	-1.0515	0.360849
PITG_22967	1718	-0.213707	0.559376	-0.451303	0.198179	-0.126606
PITG_19579	1319	-0.212994	0.102679	0.011263	-0.643559	0.165813
PITG_18822	1812	-0.211784	-0.541662	-0.124464	-0.234293	0.33804
PITG_23083	624	-0.209096	0.272604	-0.181382	-1.08193	0.411289
PITG_16605	2513	-0.208443	0.00571763	0.274297	-1.0515	0.299928
PITG_16622	1281	-0.207233	-0.046897	0.239369	-0.119997	-0.0226078
PITG_23167	219	-0.206451	0.0202172	-0.69923	-2.74935	1.60393
PITG_19347	1041	-0.204141	0.204642	-0.33666	-0.395004	0.215369
PITG_22836	627	-0.202817	0.568654	-0.394376	-0.501426	0.169267
PITG_16609	1800	-0.202579	-0.274526	0.0783772	-0.235474	0.173466
PITG_23089	1839	-0.200299	-0.559207	-0.02312	-0.20746	0.33665
PITG_16621	1805	-0.196629	-0.44373	-0.0104321	-0.579429	0.431097
PITG_22820	492	-0.192645	-0.39482	0.27805	0.835609	-0.152141
PITG_16616	1773	-0.189572	-0.46521	-0.0351963	-0.216859	0.340899
PITG_23088	1281	-0.187086	-0.0193112	0.0701567	-0.515298	0.239522
PITG_19588	1161	-0.186413	0.190142	-0.136988	-0.916464	0.385294
PITG_19578	1347	-0.185556	-0.0322502	0.0673389	-0.41593	0.210591
PITG_20170	1125	-0.179909	-0.0193112	-0.29484	-0.579429	0.438256
PITG_18823	1287	-0.17724	-0.0793185	-0.0223454	-0.472513	0.318179
PITG_19318	1815	-0.175639	-0.552362	0.00602633	0.0513376	0.262897
PITG_18833	2016	-0.174834	0.335091	0.117058	-0.824541	0.210923
PITG_16613	1296	-0.173536	0.102679	-0.0240701	0.00553387	0.0835433
PITG_20163	1842	-0.173332	-0.48793	-0.0528674	-0.216859	0.396338
PITG_18834	1680	-0.170986	0.479649	0.283068	-0.962757	0.0942594
PITG_16580	1812	-0.169237	-0.518203	-0.0318057	-0.18515	0.368602
PITG_22186	1331	-0.166249	-0.172428	-0.0911843	-0.20746	0.277706
PITG_12098	1258	-0.165424	0.441681	-0.579931	-0.0648555	0.159149
PITG_21891	623	-0.16285	0.714804	-0.286034	-0.579429	0.148254
PITG_07501	519	-0.162271	-2.09526	0.470695	1.12101	-0.0226078
PITG_05049	1374	-0.161967	-0.577684	0.596225	-0.0248398	0.265518
PITG_20168	2557	-0.161967	0.00654226	0.243924	-0.930901	0.356841
PITG_23071	2792	-0.15056	0.470879	-0.609476	0.85667	0.0480338
PITG_16618	1815	-0.150176	-0.44373	0.00602633	-0.216859	0.379719
PITG_19570	1279	-0.147557	0.174545	0.0962991	-0.225792	0.114896
PITG_07507	492	-0.146841	-1.39482	0.833265	1.7425	-0.811104
PITG_19339	1621	-0.139725	0.0202172	-0.266271	0.567413	0.0400329
PITG_16636	1806	-0.134017	-0.625118	0.197676	-0.615955	0.533342
PITG_05212	2646	-0.131245	0.348022	-0.126546	-1.14333	0.592793
PITG_08450	1224	-0.130704	-0.0114917	-0.142282	-0.512314	0.310203
PITG_12613	1298	-0.127379	0.351423	0.0836715	-0.0489139	0.00669296
PITG_08545	1885	-0.123148	0.712095	0.33945	-0.216859	-0.139726
PITG_16597	1293	-0.121136	0.360067	0.00503103	-0.0558667	0.0633654
PITG_19567	1811	-0.121092	-0.370573	0.0480035	-0.0741933	0.398819
PITG_16600	1296	-0.11984	0.0395825	0.0556571	-0.344963	0.346438
PITG_16575	1287	-0.118644	0.0395825	-0.157337	-0.518028	0.43944
PITG_23166	1836	-0.118644	-0.541662	0.0836715	-0.203919	0.429904
PITG_23063	585	-0.115477	0.20663	-0.0288764	-0.427426	0.338643
PITG_16619	1281	-0.115477	-0.0993644	0.0418513	0.140463	0.259286
PITG_19340	1296	-0.115477	-0.279343	0.241213	-0.0388602	0.275053
PITG_19507	2541	-0.114712	0.765644	-0.175668	-0.0200012	-0.0912116
PITG_16598	1296	-0.11382	0.145748	0.229687	-0.119997	0.104007
PITG_07751	1498	-0.112894	1.05769	-1.20738	-0.257501	0.432822
PITG_16576	1269	-0.111031	-0.0228515	0.363779	-0.164391	0.163805
PITG_23175	759	-0.109878	-0.617213	0.622698	0.193161	0.0407977
PITG_21963	1286	-0.107803	0.342145	-0.628841	-1.04891	0.634307
PITG_23064	319	-0.0931094	0.60518	-0.266271	-1.57943	0.866968
PITG_19577	1883	-0.0864148	-0.229761	0.0270879	-0.10736	0.469916
PITG_17816	1701	-0.0845335	0.368141	-0.35938	0.131065	0.334747
PITG_12645	1299	-0.0829894	-0.177229	0.0556571	0.508034	0.188896
PITG_16584	1281	-0.0790716	-0.0661976	0.0270879	0.21412	0.330915
PITG_07488	315	-0.0740006	-0.131786	1.69309	0.742499	-1.13303
PITG_12645	1299	-0.0740006	-0.177229	0.0556571	0.601144	0.188896
PITG_22536	576	-0.0740006	0.102679	0.264244	-1.03886	0.686396
PITG_16635	1278	-0.0734622	0.235946	0.27805	0.179563	0.0734191
PITG_20171	1281	-0.0724085	0.074665	0.197676	-0.081929	0.261653
PITG_21413	1280	-0.0676387	0.382787	0.248302	0.00553387	0.0655139
PITG_22848	1146	-0.0671142	0.51207	0.219156	0.420571	-0.152141
PITG_16221	1539	-0.0660892	0.283252	0.563804	-0.441925	0.077865
PITG_12619	1740	-0.0645403	1.00957	-0.291146	1.62221	-0.214459
PITG_12643	1309	-0.0644887	-0.149708	0.225582	-1.094	0.692663
PITG_12641	1296	-0.0641303	-0.242817	0.241213	0.108627	0.338643
PITG_18820	1287	-0.0637256	-0.0163087	0.185292	-0.520535	0.476178
PITG_16624	1289	-0.0584167	0.110415	0.0701567	-0.0388602	0.374452
PITG_12608	1351	-0.0572249	0.10768	0.157537	0.239999	0.22737
PITG_12644	1299	-0.0547925	-0.177229	0.0556571	0.549854	0.231965
PITG_16581	1287	-0.0541074	-0.0163087	0.229687	-0.524981	0.480662
PITG_23168	1307	-0.0448542	0.0526387	-0.00323659	0.613216	0.253027
PITG_16615	1287	-0.040642	0.46079	-0.0975892	-0.520535	0.414189
PITG_16593	1270	-0.030806	0.190142	0.248302	0.198179	0.188896
PITG_22874	1230	-0.0299532	0.247628	0.416247	-0.0940018	0.284474
PITG_23086	1278	-0.0229004	0.321387	0.355217	0.0420597	0.139987
PITG_23165	1287	-0.017278	0.342145	0.092183	-0.32789	0.39243
PITG_12023	2532	-0.0166787	0.266378	0.238034	0.494572	0.0245095
PITG_12612	1743	-0.0105692	1.00728	-0.488663	1.42057	-0.0656765
PITG_22939	815	-0.00841224	1.30179	0.240689	-0.453898	-0.0268324
PITG_19377	570	0	0.357252	0.171134	-0.994466	0.866968
PITG_19589	1677	0	-0.312358	0.119222	-0.30641	0.677396
PITG_18547	597	0	0.157721	0.27805	-0.0319408	0.188896
PITG_12091	1223	0	0.342145	0.746329	-0.941999	0.306733
PITG_12025	2510	0.00846158	0.90474	-0.440038	0.4601	0.0752395
PITG_12027	2541	0.00861313	0.911841	0.131893	-0.216859	0.0734191
PITG_23161	2478	0.0183785	0.723824	-0.0636418	0.268568	0.087613
PITG_12011	2445	0.0241125	0.568654	0.436747	-0.0351081	0.061517
PITG_19571	1281	0.0295443	0.24261	-0.0501376	0.21412	0.407906
PITG_23084	1476	0.0354053	0.0202172	0.518	-0.289922	0.424525
PITG_07509	829	0.0450879	-0.172428	0.264244	0.905998	0.188896
PITG_22856	2421	0.0484985	0.698289	0.119222	-1.27987	0.679883
PITG_19510	2552	0.0489096	0.894686	-0.098671	0.170593	0.147076
PITG_01884	1110	0.049753	0.0202172	-0.599695	0.536049	1.1889
PITG_12632	1076	0.0540398	-0.39482	0.229687	-0.579429	0.747387
PITG_17189	570	0.0614005	0.846188	0.470695	-0.994466	0.510824
PITG_22017	468	0.0641303	0.60518	0.470695	2.00553	-0.811104
PITG_23164	963	0.069709	0.0982197	0.19506	-0.739893	0.861322
PITG_23082	1200	0.0721498	0.342145	-0.166735	-0.119997	0.551466
PITG_23085	1231	0.0766213	0.329545	0.359663	-0.579429	0.551466
PITG_12028	2580	0.0855757	0.700337	0.092183	0.524908	0.119634
PITG_16589	1270	0.0861566	0.398729	0.374479	0.179563	0.312279
PITG_19509	2526	0.0879477	0.539591	-0.00847324	0.520107	0.233984
PITG_16585	1677	0.0897302	-0.217943	0.248302	-0.178891	0.679883
PITG_20425	2573	0.0907655	0.927108	-0.981818	-0.801821	0.9207
PITG_12624	1389	0.0922585	-0.00487378	0.0701567	0.420571	0.660965
PITG_23197	331	0.0931094	-0.617213	-0.0438786	2.88	0.0633654
PITG_19565	1587	0.0944156	0.170777	0.398545	-0.579429	0.603934
PITG_02006	1728	0.0972972	1.03581	-0.229745	-0.164391	0.425935
PITG_12009	468	0.102362	-0.131786	-0.0528674	0.590496	0.411289
PITG_12626	1914	0.112027	0.505644	-0.160072	-0.344963	0.714358
PITG_22290	357	0.113211	0.190142	-0.42239	-0.316394	1.3264
PITG_12026	2644	0.12749	0.60518	-0.142282	0.590496	0.39243
PITG_16644	1939	0.134301	0.391055	0.611557	-0.489231	0.470309
PITG_18826	1389	0.13465	0.169081	0.148767	0.894503	0.411289
PITG_20641	1536	0.135655	-0.160355	0.0232356	-0.0769283	1.01202
PITG_19497	888	0.156119	0.498264	0.27805	-0.138856	0.488457
PITG_19334	1150	0.156504	0.797825	-0.455305	-1.20746	0.85769
PITG_12609	1392	0.173332	0.209251	-0.0438786	1.88	0.188896
PITG_16144	978	0.175318	0.675569	0.542844	0.313656	0.00832405
PITG_14319	1059	0.182864	1.05264	0.715807	-0.742927	0.386836
PITG_21583	1050	0.185032	0.927108	0.634193	-0.731432	0.491459
PITG_14314	1201	0.187933	1.08162	0.715807	-0.731432	0.311753
PITG_19889	1662	0.188072	0.720657	0.31023	0.121011	0.469004
PITG_07506	627	0.203533	-0.202175	0.760201	2.12101	-0.396066
PITG_14775	984	0.208317	1.12601	0.367601	-0.653429	0.556628
PITG_17176	1758	0.209453	0.283252	0.0259098	-0.138856	0.978973
PITG_05045	570	0.21818	1.02022	0.229687	-0.901357	0.840973
PITG_14267	1902	0.224317	0.212862	0.199393	0.835609	0.340899
PITG_14349	1221	0.229482	1.05975	0.470695	-0.146469	0.293233
PITG_11571	2208	0.241973	0.953103	-1.03832	1.29504	0.786137
PITG_17185	1227	0.258152	1.30262	0.470695	-0.187111	0.214892
PITG_22943	1105	0.263034	1.60518	-0.306913	-0.0388602	0.503005
PITG_18554	1761	0.284729	0.56336	0.213537	-0.238392	0.975903
PITG_18847	1215	0.285909	1.34215	0.542844	-0.357036	0.268331
PITG_02302	1833	0.286523	0.557874	0.0444298	-0.105497	1.07642
PITG_14309	1851	0.301054	0.639127	0.384965	-0.316394	0.892911
PITG_05043	384	0.304855	-0.494356	1.47069	-0.579429	1.3409
PITG_22830	498	0.321928	1.69829	-1.52931	1.42057	0.724949
PITG_18546	1969	0.34453	0.797825	0.173713	-0.295636	1.00832
PITG_22850	873	0.359896	1.44168	-0.529305	0.268568	0.940969
PITG_14351	1933	0.36257	0.935328	0.140546	-0.231505	0.96877
PITG_22832	1812	0.365396	0.914508	-0.237125	0.356441	0.947888
PITG_19394	1761	0.371559	0.60518	0.470695	-0.294026	1.03689
PITG_23274	1806	0.375367	0.326879	0.308423	-0.164391	1.06337
PITG_22487	1807	0.385743	0.318876	0.537809	-0.223285	0.991216
PITG_12646	1818	0.411678	0.43853	0.411801	0.237707	0.96109
PITG_22746	234	0.415037	0.60518	0.470695	-1.57943	1.51082
PITG_12090	1866	0.422127	0.431848	0.503116	-0.409504	1.08873
PITG_12094	1800	0.447459	0.515912	0.50546	-0.1961	1.03498
PITG_04856	2517	0.469485	1.74604	0.175239	-0.227956	0.678481
PITG_22762	522	0.485427	1.45318	-0.266271	1.7425	0.703469
PITG_11074	1102	0.526069	2.19014	-0.377302	-0.257501	0.581214
PITG_22822	178	0.530515	0.60518	1.47069	2.22793	-1.8111
PITG_22525	1785	0.530515	0.98705	-0.129698	-0.13197	1.6523
PITG_16626	1749	0.541075	0.728036	0.677145	-0.365304	1.16783
PITG_14343	1761	0.546282	1.49826	0.293817	-0.10736	0.957081
PITG_23221	522	0.547488	1.25726	-0.207377	0.742499	1.10643
PITG_10587	1314	0.606246	1.21184	1.01818	0.572574	0.634961
PITG_08070	645	0.620066	1.74268	-0.144015	-0.749354	1.01487
PITG_22831	1416	0.638492	1.63375	-0.851233	-0.579429	1.50149
PITG_08067	1176	0.713573	1.47965	0.470695	0.69359	0.987984
PITG_22833	451	0.729352	2.70472	-1.11427	0.835609	0.4004
PITG_12336	491	0.77259	2.92711	0.470695	-0.801821	0.603934
PITG_16596	1226	0.794416	0.803119	1.05566	-0.0200012	1.41129
PITG_23144	690	0.836501	3.19014	-0.245512	0.420571	0.39835
PITG_23073	521	0.850253	2.57481	0.775549	0.420571	0.658382
PITG_23280	347	0.870365	3.21989	0.470695	-0.579429	0.648328
PITG_23029	1794	0.984687	1.59987	0.391127	-0.633876	1.66556
PITG_20199	770	1.05658	2.24904	0.57761	-0.164391	1.49822
TRANSPOSONS
Novel_DNA_transposon_19	1776	-1.27787	-1.93398	-0.29435	-0.596916	-1.76328
Novel_repeat_unknown_type_1	2552	-1.16852	-2.37703	-0.00224128	-0.592029	-1.79423
Novel_IS4_like_3	2733	-1.07834	-1.51915	-0.328608	-0.806839	-0.979048
hAT_Pi_3	1898	-1.06178	-1.88209	0.0701567	-0.414369	-1.40123
Novel_piggyBAC_12	1803	-1.04944	-1.97487	-0.0815872	-0.233501	-1.69449
Novel_piggyBAC_25	3644	-0.995058	-1.04252	-0.241916	-0.890515	-1.11661
Novel_crypton_like_10	3418	-0.988767	-1.57892	-0.0668804	-0.248049	-1.55735
hAT_Pi_2	1939	-0.980504	-1.20218	0.0527038	-0.901357	-1.12015
gi|60116487|gb|AY848954.1|	257	-0.896907	-0.617213	-0.69923	0.0986433	-1.07414
Novel_Mutator_like_1	1337	-0.891851	-1.45096	0.201508	-0.357036	-1.22614
Novel_piggyBAC_37	3425	-0.867667	-1.5561	0.011641	-0.229486	-1.16423
DodoPi	2723	-0.815363	-1.27746	-0.10442	-0.0940018	-1.18962
Novel_piggyBAC_21	3528	-0.805952	-0.695687	-0.266271	-0.388907	-0.886205
Novel_Mariner_like_1	1194	-0.803108	-0.824808	0.0799046	0.0835364	-1.33884
Novel_piggyBAC_8	3530	-0.76202	-0.769565	-0.00552024	-0.217521	-1.09096
Novel_piggyBAC_36	2911	-0.761737	-0.458951	-0.145977	-0.00431391	-0.995022
Novel_DNA_transposon_3	632	-0.749192	-0.78968	-0.136988	0.0986433	-1.25168
Novel_DNA_transposon_9	2676	-0.722705	-0.637677	-0.238257	-0.655377	-0.552571
Novel_crypton_like_12	2885	-0.706981	-0.989182	0.011263	0.153091	-1.03518
Novel_Gypsy_LTR_8	6463	-0.694204	-0.944837	-0.0758215	-0.0980888	-1.10127
hAT_Pi_5	2153	-0.676203	-0.930201	0.273393	-0.508346	-0.98229
Novel_crypton_like_5	2396	-0.663173	-0.726664	0.141387	-0.671059	-0.581236
Novel_piggyBAC_19	4034	-0.650967	-1.07796	-0.0350841	-0.32945	-0.492656
Novel_DNA_transposon_14	2944	-0.650058	-0.245957	-0.441843	-0.238392	-0.578658
Novel_piggyBAC_11	3424	-0.632989	-1.18789	0.0948923	-0.149564	-0.824998
Novel_crypton_like_13	4074	-0.629831	-0.979783	0.0605393	-0.288126	-1.13899
Novel_piggyBAC_10	3962	-0.628703	-0.83493	0.129858	-0.837741	-0.450356
hAT_Pi_1	2100	-0.627309	-0.737708	-0.26161	0.366124	-0.500403
Novel_DNA_transposon_29	6811	-0.616434	-0.743109	-0.13107	-0.123749	-0.563052
Novel_Copia_LTR_12	1097	-0.612977	-0.559207	-0.266271	-0.196959	-0.268311
Novel_piggyBAC_22	3524	-0.605282	-0.748457	-0.195304	0.554872	-0.938859
Novel_Copia_LTR_10	6305	-0.603411	-1.05549	0.11053	-0.257932	-0.945352
Novel_piggyBAC_31	3447	-0.602959	-1.02709	0.119569	-0.00237133	-0.677202
Novel_crypton_like_2	540	-0.584963	0.675569	0.377585	-0.357036	-1.83858
Novel_piggyBAC_20	4286	-0.55122	-0.347823	-0.145977	-0.116802	-0.618459
Novel_DNA_transposon_18	4921	-0.535937	-0.522773	0.144401	-0.388063	-0.508307
Novel_DNA_transposon_25	5032	-0.529185	-0.202175	0.132336	-0.737381	-0.545292
Novel_Copia_LTR_1	5858	-0.510137	-0.833612	-0.000343638	0.183366	-0.498465
Novel_crypton_like_3	3636	-0.504529	-0.472823	-0.0465233	-0.214856	-0.487989
Novel_DNA_transposon_21	4813	-0.489368	-0.599709	0.228591	0.153926	-0.745049
Novel_piggyBAC_17	3708	-0.485	-0.673536	-0.0491729	-0.274574	-0.265454
Novel_Gypsy_LTR_18	5108	-0.484659	-0.540777	0.166629	0.090013	-0.593761
Novel_piggyBAC_24	3350	-0.475858	-0.835393	-0.176073	-0.246302	-0.10061
Novel_Gypsy_LTR_9	12564	-0.468275	-0.0984887	-0.15918	-0.115148	-0.297406
Novel_Pogo_1	1895	-0.465435	-0.00362955	-0.164894	-0.405399	-0.358592
Novel_DNA_transposon_23	4751	-0.464991	-0.284117	0.0929381	-0.348648	-0.457705
Novel_Mariner_like_3	2627	-0.464919	-0.451404	0.125866	0.0450622	-0.537539
Novel_DNA_transposon_11	2297	-0.459707	-0.617213	-0.166735	0.477715	-1.24145
Novel_crypton_like_8	3128	-0.450298	-0.736377	0.106641	0.00185821	-0.596829
Novel_piggyBAC_26	3499	-0.445559	-0.232549	0.160354	-0.273926	-0.507269
Novel_piggyBAC_28	4161	-0.436887	-0.609833	0.281661	-0.145775	-0.317087
Novel_piggyBAC_30	4508	-0.427459	-0.606072	0.255378	-0.0791285	-0.574869
Novel_DNA_transposon_7	2335	-0.424907	0.336841	-0.0553742	-0.108123	-0.604912
Novel_DNA_transposon_6	4489	-0.420246	-0.0942415	0.125559	-0.372104	-0.460073
Novel_DNA_transposon_22	3977	-0.418713	-0.403698	0.113824	-0.229371	-0.355424
Copia_Pi_1	4655	-0.411743	-0.298758	-0.215341	0.00553387	-0.243005
Novel_crypton_like_11	3180	-0.408806	-0.0703854	-0.00367704	-0.111924	-0.486753
Novel_piggyBAC_33	7163	-0.400538	-0.211453	-0.00556164	-0.225079	-0.317756
Novel_Gypsy_LTR_7	6318	-0.394084	-0.845436	0.191361	-0.315679	-0.239349
Novel_PiggyBAC_4	3668	-0.3926	0.535867	-0.312548	-0.0497486	-0.403414
Novel_repeat_unknown_type_7	418	-0.392317	0.60518	-0.529305	-0.579429	0.0189713
Novel_DNA_transposon_8	2757	-0.386058	-0.25043	0.0870475	-0.413843	-0.157554
Novel_DNA_transposon_20	4739	-0.385438	-0.0361653	0.138593	-0.074306	-0.469487
Novel_Mutator_like_5	4129	-0.379952	0.247628	-0.045429	-0.239942	-0.359724
Novel_piggyBAC_1	4039	-0.378978	-0.0690501	0.170521	0.167285	-0.562845
Novel_piggyBAC_7	4350	-0.378192	-0.131786	0.26472	-0.198122	-0.502057
Novel_piggyBAC_14	3731	-0.375305	0.0944418	-0.0773168	-0.176464	-0.316803
Novel_crypton_like_14	3010	-0.373539	-0.0386765	0.0832128	-0.370333	-0.312441
Novel_piggyBAC_6	3668	-0.36812	0.670312	-0.383765	0.0313959	-0.425213
Novel_Gypsy_LTR_17	5452	-0.366518	0.117242	0.022337	-0.542434	-0.224114
Novel_piggyBAC_16	3627	-0.365435	-0.405547	0.309231	-0.373754	-0.446339
Tc1_Pi_1	1533	-0.36257	-0.295285	0.295608	0.112449	-0.500764
Novel_PiggyBAC_3	3997	-0.355432	-0.229042	0.279362	-0.579429	-0.259404
Novel_Copia_LTR_8	7317	-0.354991	-0.52579	0.0382268	0.138595	-0.266572
Novel_DNA_transposon_24	4752	-0.341568	-0.528303	0.317724	0.0405403	-0.300688
Novel_piggyBAC_13	2837	-0.339358	-0.344194	-0.313577	-0.744488	0.354482
Novel_DNA_transposon_4	5995	-0.316414	0.262493	-0.150794	-0.328367	-0.150261
Copia_Pi_2	5700	-0.284143	-0.153266	0.0150151	0.131065	-0.155687
Novel_Mutator_like_3	6458	-0.283793	0.0540055	0.087366	-0.0585965	-0.306959
Novel_Gypsy_LTR_11	5585	-0.277534	0.0499645	0.140546	0.50546	-0.43992
Novel_crypton_like_6	3285	-0.265317	0.00932888	0.0854044	-0.227956	-0.0270813
Novel_Tc1_1	1547	-0.265142	-0.188369	0.0325735	-0.801821	0.24779
Novel_piggyBAC_29	3502	-0.260591	0.407734	-0.0663334	0.174411	-0.324575
Novel_Mutator_like_7	4467	-0.256619	0.154867	0.15713	-0.145026	-0.332183
Novel_piggyBAC_15	4313	-0.252956	-0.086698	0.0854044	-0.725279	0.302968
Novel_piggyBAC_5	3673	-0.243318	0.205773	0.216938	-0.148794	-0.203058
Novel_DNA_transposon_26	3236	-0.240263	0.906046	-0.181382	-0.579429	-0.215799
Novel_Mutator_like_2	3092	-0.235488	-0.0646717	-0.054625	-0.0248398	0.0230874
Pi_helitron_B	6364	-0.230683	-0.315041	0.0412904	-0.0337297	0.0232256
Novel_Pogo_2	2096	-0.226885	-0.0401554	0.011263	-0.216859	0.162179
Novel_helENtron_2	8616	-0.215013	0.192205	0.22309	0.0328412	-0.340883
Novel_DNA_transposon_10	2818	-0.214809	0.364172	0.114551	-0.510716	-0.0562162
Novel_Gypsy_LTR_10	8039	-0.212467	-0.340373	0.241046	0.250037	-0.18236
Novel_Copia_LTR_3	4723	-0.202579	-0.565389	0.151491	0.0708429	0.0238109
Novel_piggyBAC_23	2901	-0.195787	0.673892	-0.163178	-0.126916	-0.125212
Novel_DNA_transposon_30	4642	-0.188637	0.20663	0.0535738	-0.200917	-0.00138177
Novel_piggyBAC_32	4157	-0.170409	0.399319	0.20418	-0.235944	-0.10546
Novel_DNA_transposon_28	5260	-0.151559	0.345536	0.0246302	0.232944	-0.130476
Novel_DIRS1_like	6048	-0.142909	0.0150555	0.0191312	0.0109271	0.103427
Novel_Gypsy_LTR_2	7708	-0.139361	0.204242	0.120413	0.00817375	0.0132959
Novel_crypton_like_7	2829	-0.128156	0.357252	-0.000611119	-0.3637	0.20936
Novel_Mariner_like_2	1530	-0.127235	0.364172	-0.0795025	0.121011	0.0858028
Gypsy_Pi_1	8219	-0.126279	0.113993	0.121077	0.128203	0.0813491
Novel_DNA_transposon_15	4825	-0.120702	0.347848	0.0769162	-0.158291	0.0965994
Novel_IS4_like_1	2226	-0.119213	1.22632	0.398683	0.590496	-0.383069
hAT_Pi_6	995	-0.116645	0.444715	-0.607308	-0.386784	0.648328
Novel_Copia_LTR_6	5823	-0.112894	0.327195	-0.0863619	0.00553387	0.181363
Novel_Gypsy_LTR_5	8306	-0.0841572	0.154043	0.212969	0.195505	0.0808
hAT_Pi_4	2168	-0.0841206	0.932161	0.10642	-0.360116	-0.133032
Novel_DNA_transposon_12	1876	-0.0751875	0.435255	-0.114268	-0.282447	0.471296
Novel_Mariner_like_4	1607	-0.0598715	0.712095	-0.691577	-0.749354	0.762082
Novel_Gypsy_LTR_1c	10393	-0.0598544	0.062811	0.156416	-0.0195571	0.299104
Novel_Gypsy_LTR_3	7598	-0.0563616	0.0656725	0.0770778	0.103997	0.254168
Novel_Mutator_like_6	4244	-0.053596	0.578213	0.158751	0.171212	-0.0546607
Novel_helENtron	14437	-0.0511965	0.208032	0.166026	-0.207728	0.269493
Novel_crypton_like_4	3093	-0.0433274	0.537008	-0.107072	-0.293124	0.363671
Novel_Mutator_like_9	2317	-0.0367586	0.55627	0.13366	-0.316394	0.273785
Novel_Gypsy_LTR_1b	10368	-0.0270245	0.200058	0.143461	-0.0335189	0.332034
Novel_Gypsy_LTR_12	5402	-0.0261523	0.52388	-0.261372	-0.0983019	0.398689
Gypsy_Pi_2	13015	-0.0114908	0.325072	-0.00414509	0.158986	0.369554
Novel_Mutator_like_8	3601	-0.00443225	0.746536	0.436747	-0.543805	0.110286
Novel_piggyBAC_9	4381	0.0109503	0.51945	-0.0807153	0.119191	0.373928
Novel_piggyBAC_27	3431	0.0289791	0.649574	0.280173	0.0943431	0.105238
Novel_crypton_like_1	3162	0.0360693	1.00728	-0.148215	0.00553387	0.255567
Novel_Gypsy_LTR_14	4588	0.0474614	0.626553	-0.277767	0.0986433	0.484787
Novel_piggyBAC_34	2830	0.0548619	1.19992	0.389775	-0.0863886	-0.0993487
Novel_Copia_LTR_9	4741	0.0552156	0.917967	0.129003	-0.212646	0.296309
Novel_Copia_LTR_7	6345	0.056338	0.127601	0.317448	0.733162	0.310458
Pi_helitron_A	7261	0.0668879	0.233211	0.144841	-0.127257	0.502338
Gypsy_Pi_3a	7625	0.0673739	0.329329	0.17914	0.0769962	0.354407
Copia_Pi_3	5491	0.0871771	0.409629	0.337171	-0.27362	0.535265
Novel_Gypsy_LTR_16	9932	0.0953924	0.642365	0.0568324	0.135931	0.23092
Novel_LTR_2	7304	0.106345	0.316992	0.279432	0.0254334	0.478731
Novel_piggyBAC_35	3279	0.128709	0.38972	0.073691	0.203473	0.622864
Novel_Gypsy_LTR_1a_ALBATROSS_2	15172	0.141922	0.393437	0.183195	0.037503	0.582266
Novel_Gypsy_LTR_6	7578	0.157996	0.49988	0.303752	0.15571	0.405
Novel_IS4_like_2	2484	0.181384	1.19014	-0.0543964	0.186106	0.309912
Novel_Gypsy_LTR_15	5067	0.186413	0.319023	0.270617	-0.15342	0.70313
Novel_LTR_1a	11794	0.215854	0.382262	0.227572	0.0397309	0.71271
Novel_DNA_transposon_27	5044	0.216366	1.52272	0.0471955	0.0178122	0.309191
>Non_autonomous_helitron_1	1620	0.219642	0.74957	-0.0147322	-0.530519	0.925862
Novel_DNA_transposon_13	1943	0.232308	0.725474	0.266077	-0.20597	0.673165
Novel_Mariner_like_5	955	0.237039	1.16589	0.27805	0.29504	0.222844
Novel_Copia_LTR_4	4838	0.274941	1.30418	0.016663	-0.686344	0.635743
Novel_Gypsy_LTR_4	7476	0.275548	0.683447	0.106456	0.100089	0.774298
Novel_LTR_1b_Albatross_1	15000	0.279807	0.495065	0.230703	0.0683202	0.791827
Novel_repeat_unknown_type_8	629	0.29956	0.60518	0.27805	1.42057	0.603934
Novel_IS4_like_4	3236	0.359403	1.79128	0.0263925	0.25882	0.114257
Novel_Copia_LTR_5	4876	0.361656	0.976274	-0.168039	0.305094	1.02676
Novel_DNA_transposon_5	4707	0.389526	1.54547	0.397038	0.0682696	0.41544
Novel_Copia_LTR_11	4597	0.485162	1.03717	0.285215	0.173839	0.872
Novel_crypton_like_9	3252	0.488538	0.79561	0.372847	0.329806	1.02899
Novel_LTR_4	14947	0.556734	0.980932	0.265665	0.173479	1.12701
Novel_Gypsy_LTR_13_Albatross_3	15003	0.580016	1.10942	0.281861	0.186198	1.11952
Satellite_2	183	0.626619	1.22185	0.129658	-0.0994357	1.29611
Novel_DNA_transposon_1	753	0.771181	1.30562	0.718622	-1.21686	1.54037
Novel_piggyBAC_18	3485	1.03276	3.16926	-0.321501	0.203473	0.106711
Satellite_1	45	1.078	-0.39482	0.0556571	1.00553	2.30437
Novel_DNA_transposon_17	2863	1.07901	1.67389	0.214355	0.520107	1.84468
