# Supplementary material for: Evidence for Small RNAs Homologous to Effector-Encoding Genes and Transposable Elements in the Oomycete Phytophthora infestans
Source: PLoS One. 2012 Dec 14;7(12):e51399. doi: 10.1371/journal.pone.0051399 (PMC3522703; doi:10.1371/journal.pone.0051399)
Supplement: Table S4 — Predicted miRNA sequences and their targets. (XLSX) [file pone.0051399.s014.xlsx]

## Sheet: Sheet1
Name	miRNA candidates	Length in nt	Genome location	best target, plantlike(targetAlign)	best score	total number of targets (targetAlign)	best target, animal (miranda)	best miranda score	total number of targets (miranda)
PimiRNA1	UUACACGCGUACAGCUAACCGUCA	24	50 bp upstream PITG_00222	PITG_19887T0	88	1	PITG_03764T0	198	11608
PimiRNA2	ACGUUAAGUCAUAGUAACGAG	21	PITG_12887 first exon	PITG_12887T0	105	8	PITG_13171T0	167	1527
PimiRNA3	UCUGGUCAAGCUUGUUUGAGUGUG	24	Intergenic	Upstream PITG_08953	120	16	PITG_20686T0	198	14150
PimiRNA4	CGUCAUGGUGCCGCCUGAACCAA	23	intergenic	no target found	NA	0	PITG_19640T0	195	16174
PimiRNA5	AUCGGGCAACAGCUGUCCGUAU	22	500 bp ownstream PITG_17805	Upstream PITG_22486	110	8	PITG_07272T0	195	14978
PimiRNA6	UGGCUCGAUCUACGGUGCAGU	21	PITG_00907 first exon	Upstream PITG_04112	94	6	PITG_03568T0	194	14832
miRNA	TARGET	SCORE	description
PimiRNA1	PITG_19887T0	88	conserved hypothetical protein
PimiRNA2	PITG_12887T0	105	conserved hypothetical protein
PimiRNA2	PITG_01467T0	86	conserved hypothetical protein
PimiRNA2	PITG_15601T0	84	conserved hypothetical protein
PimiRNA2	PITG_05643T0	75	hypothetical protein
PimiRNA2	PITG_19587T0	73	conserved hypothetical protein
PimiRNA2	PITG_21175T0	73	conserved hypothetical protein
PimiRNA2	PITG_14679T0	73	conserved hypothetical protein
PimiRNA3	uppstreams PITG_08953	120	double-strand-break repair protein rad21
PimiRNA3	uppstreams PITG_13198	120	conserved hypothetical protein
PimiRNA3	uppstreams PITG_15193	117	conserved hypothetical protein
PimiRNA3	uppstreams PITG_19607	112	histone arginine demethylase, putative
PimiRNA3	uppstreams PITG_08034	112	conserved hypothetical protein
PimiRNA3	uppstreams PITG_00798	112	conserved hypothetical protein
PimiRNA3	uppstreams PITG_03806	112	aspartyl-tRNA synthetase, putative
PimiRNA3	uppstreams PITG_21812	112	conserved hypothetical protein
PimiRNA3	uppstreams PITG_05721	112	hsp70-like protein
PimiRNA3	uppstreams PITG_21745	112	hypothetical protein
PimiRNA3	uppstreams PITG_01140	110	conserved hypothetical protein
PimiRNA3	uppstreams PITG_16773	109	hypothetical protein
PimiRNA3	PITG_20686T0	98	hypothetical protein
PimiRNA3	PITG_00254T0	98	mitogen-activated protein kinase, putative
PimiRNA3	uppstreams PITG_20685	98	conserved hypothetical protein
PimiRNA3	PITG_01076T0	92	ATPase AFG2 protein
PimiRNA5	uppstreams PITG_10866	110	spermidine synthase, putative
PimiRNA5	uppstreams PITG_01188	110	aspartate aminotransferase, putative
PimiRNA5	uppstreams PITG_22486	110	conserved hypothetical protein
PimiRNA5	uppstreams PITG_15033	110	choline dehydrogenase, putative
PimiRNA5	uppstreams PITG_04337	81	conserved hypothetical protein
PimiRNA5	uppstreams PITG_11900	80	protein kinase, putative
PimiRNA5	PITG_08653T0	73	mitochondrial import inner membrane translocase subunit TIM50, putative
PimiRNA5	PITG_05927T0	73	mitochondrial import inner membrane translocase subunit, putative
PimiRNA6	uppstreams PITG_04112	94	transmembrane protein, putative
PimiRNA6	uppstreams PITG_17603	78	conserved hypothetical protein
PimiRNA6	uppstreams PITG_05224	76	conserved hypothetical protein
PimiRNA6	uppstreams PITG_05225	76	4-aminobutyrate aminotransferase, mitochondrial precursor
PimiRNA6	PITG_02462T0	75	actin-like protein
PimiRNA6	PITG_06296T0	73	ATP-binding Cassette (ABC) Superfamily
PimiRNA6	uppstreams PITG_06130	73	conserved hypothetical protein
PimiRNA6	uppstreams PITG_11840	70	hypothetical protein
PimiRNA6	PITG_01745T0	70	NEDD4-like ubiquitin ligase, putative
PimiRNA6	PITG_11104T0	66	conserved hypothetical protein
PimiRNA6	PITG_04003T0	66	conserved hypothetical protein
